# Supplementary material
Source: publisher site journal article supplement (https://www.dovepress.com/article/429898)
Supplement: Supplementary file 1 [file get_supplementary_file.php]

**Development of high-loading Trastuzumab PLGA nanoparticles: a powerful tool against HER2 positive breast cancer cells**

Tania Mariastella Caputo,1† Giovannina Barisciano,2† Chiara Mulè,1 Angela Maria Cusano,3 Anna Aliberti,*1 Livio Muccillo,2 Vittorio Colantuoni,2 Lina Sabatino,*2Andrea Cusano1,3

**1.** Optoelectronics Group, Department of Engineering, University of Sannio, Benevento, Italy.

**2.** Department of Sciences and Technologies, University of Sannio, Benevento, Italy

**3.** CeRICTscrl Regional Center Information Communication Technology, Benevento, Italy

**SUPPORTING INFORMATION**

**Figure S1**

**A**


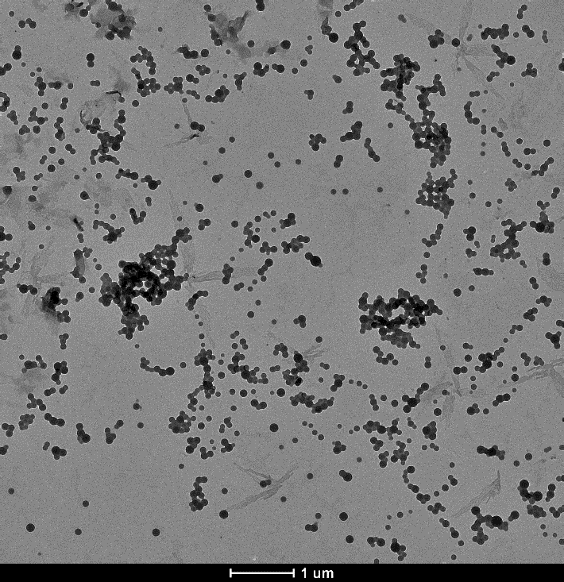

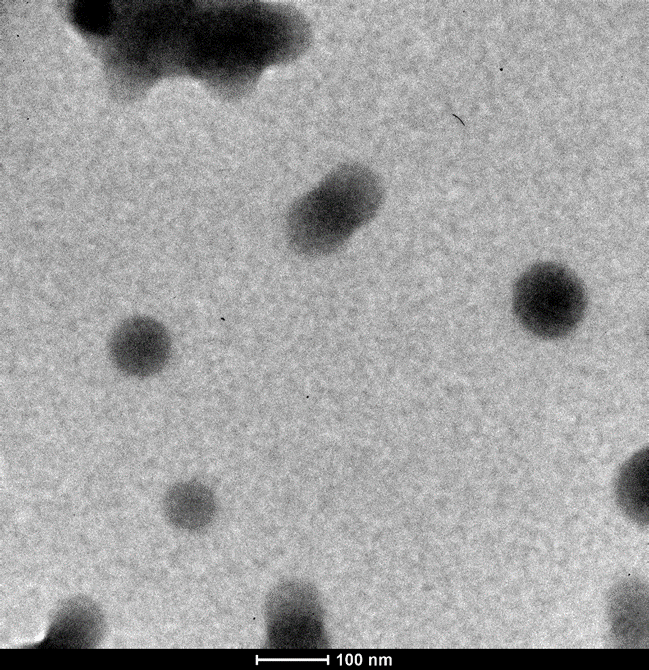


**Figure S1 A:** Transmission electron microscopy (TEM) images were acquired by depositing 5 µl of nanoparticles on TEM copper grids with a carbon coated Formvar film. After evaporation of the solution, the grid was washed with deionized water and analysed by TEM Tecnai G2 Spirit TWIN (FEI, Hillsboro, OR, USA).

**B**

**
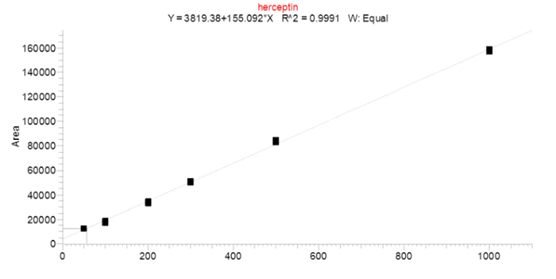
**

TZ concentration (ng/mL)

**Figure S1 B:** Trastuzumab calibration curve

**Figure S2**


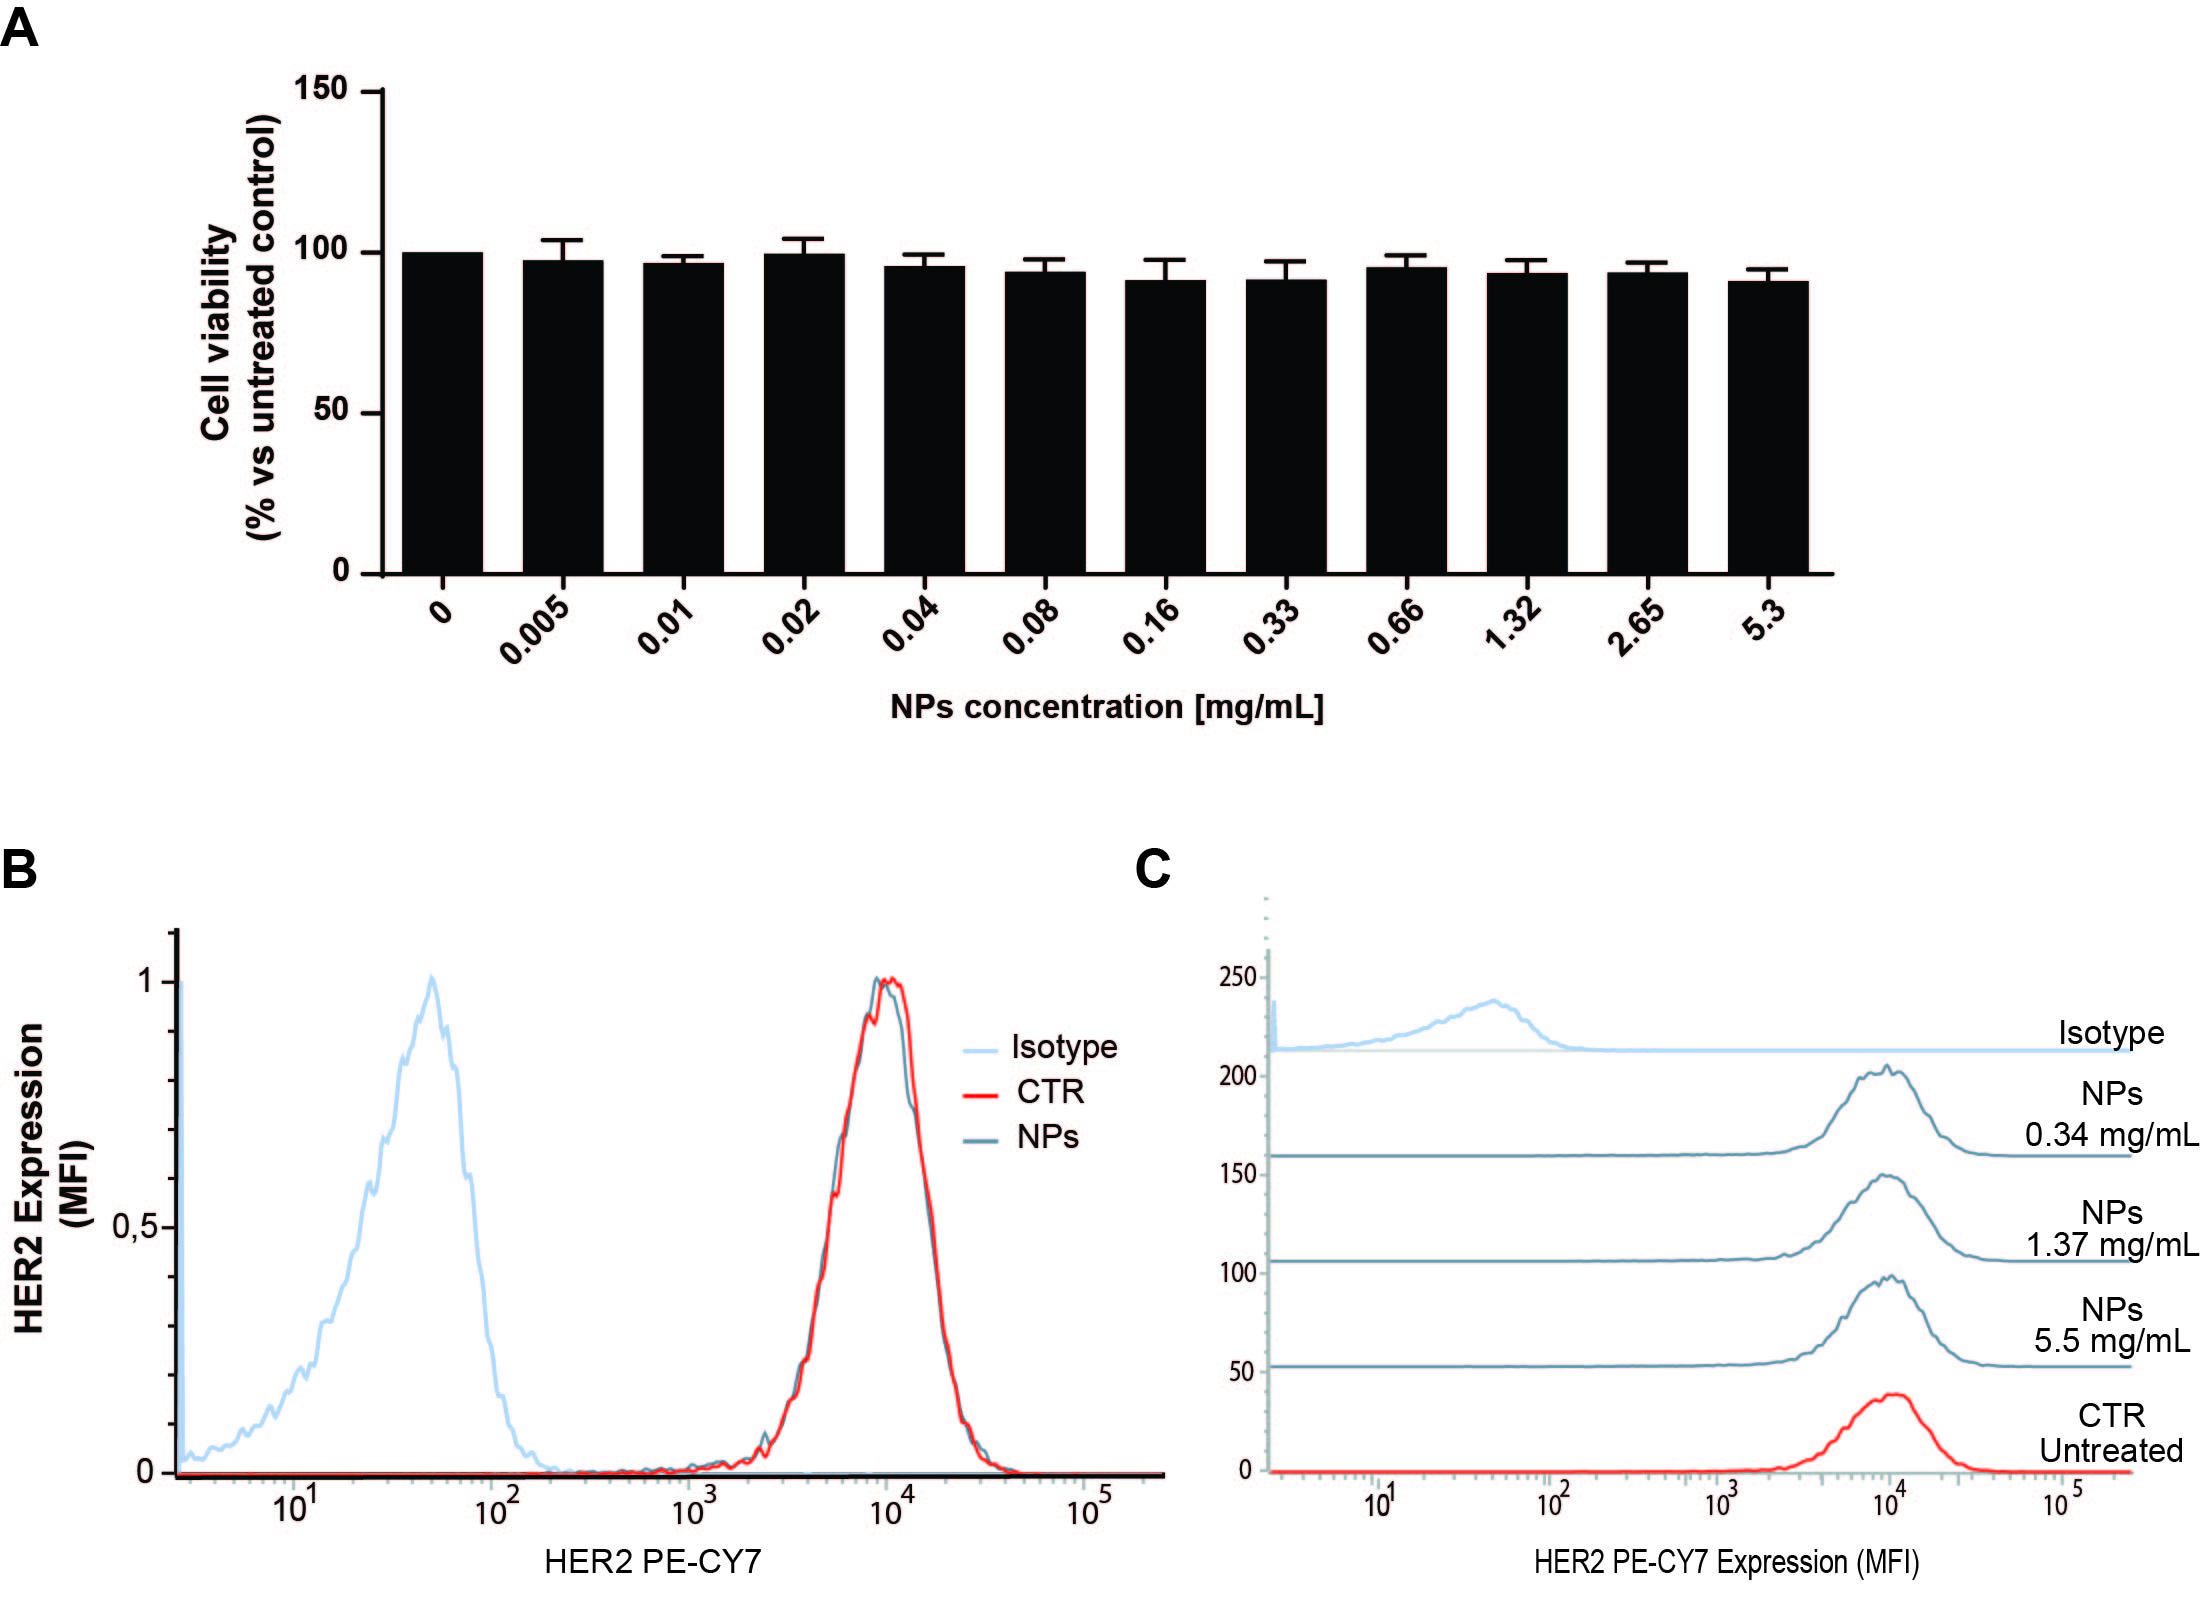


**Figure S2: Evaluation of the effects of NPs on SKBR3 cells.**

A) The histograms show the percentage of viable SKBR3 cells before or after exposure to increasing concentrations of NPs; B) The overlapping one-dimensional cytograms of untreated or NP treated SKBR3 cells indicate that cell size, shape, and complexity are not affected as determined by flow cytometry; C) HER2 surface expression in untreated or treated SKBR3 cells by using a PE -Cy7-labelled specific anti-HER2 antibody in flow cytometry. The peaks corresponding to HER2 in B) and C) are expressed as mean fluorescence intensity (MFI). Data are expressed as mean ± SEM of independent experiments performed at least in triplicate; the mean values from untreated or treated cells were compared by applying the t- test. Statistical significance was considered when * p < 0.05, ** p < 0.01, *** p < 0.001. **** p < 0.0001

**Figure S3: Confocal Z-stack images**

Confocal Z-stack images of SKBR3 labelled with: DAPI and PE -CY7 secondary antibody to stain the nucleus (I - blue channel) and the tubulin (II- red channel) and treated with FITC-bound TZ (III - green channel), either in its free form, F-TZ (A – B) or encapsulated in PLGA particles, F-TZP (C - D). IV) Merge of II and III channels and V) all channels.

F-TZ

A) SKBR after 30 minutes of incubation with F-Tz


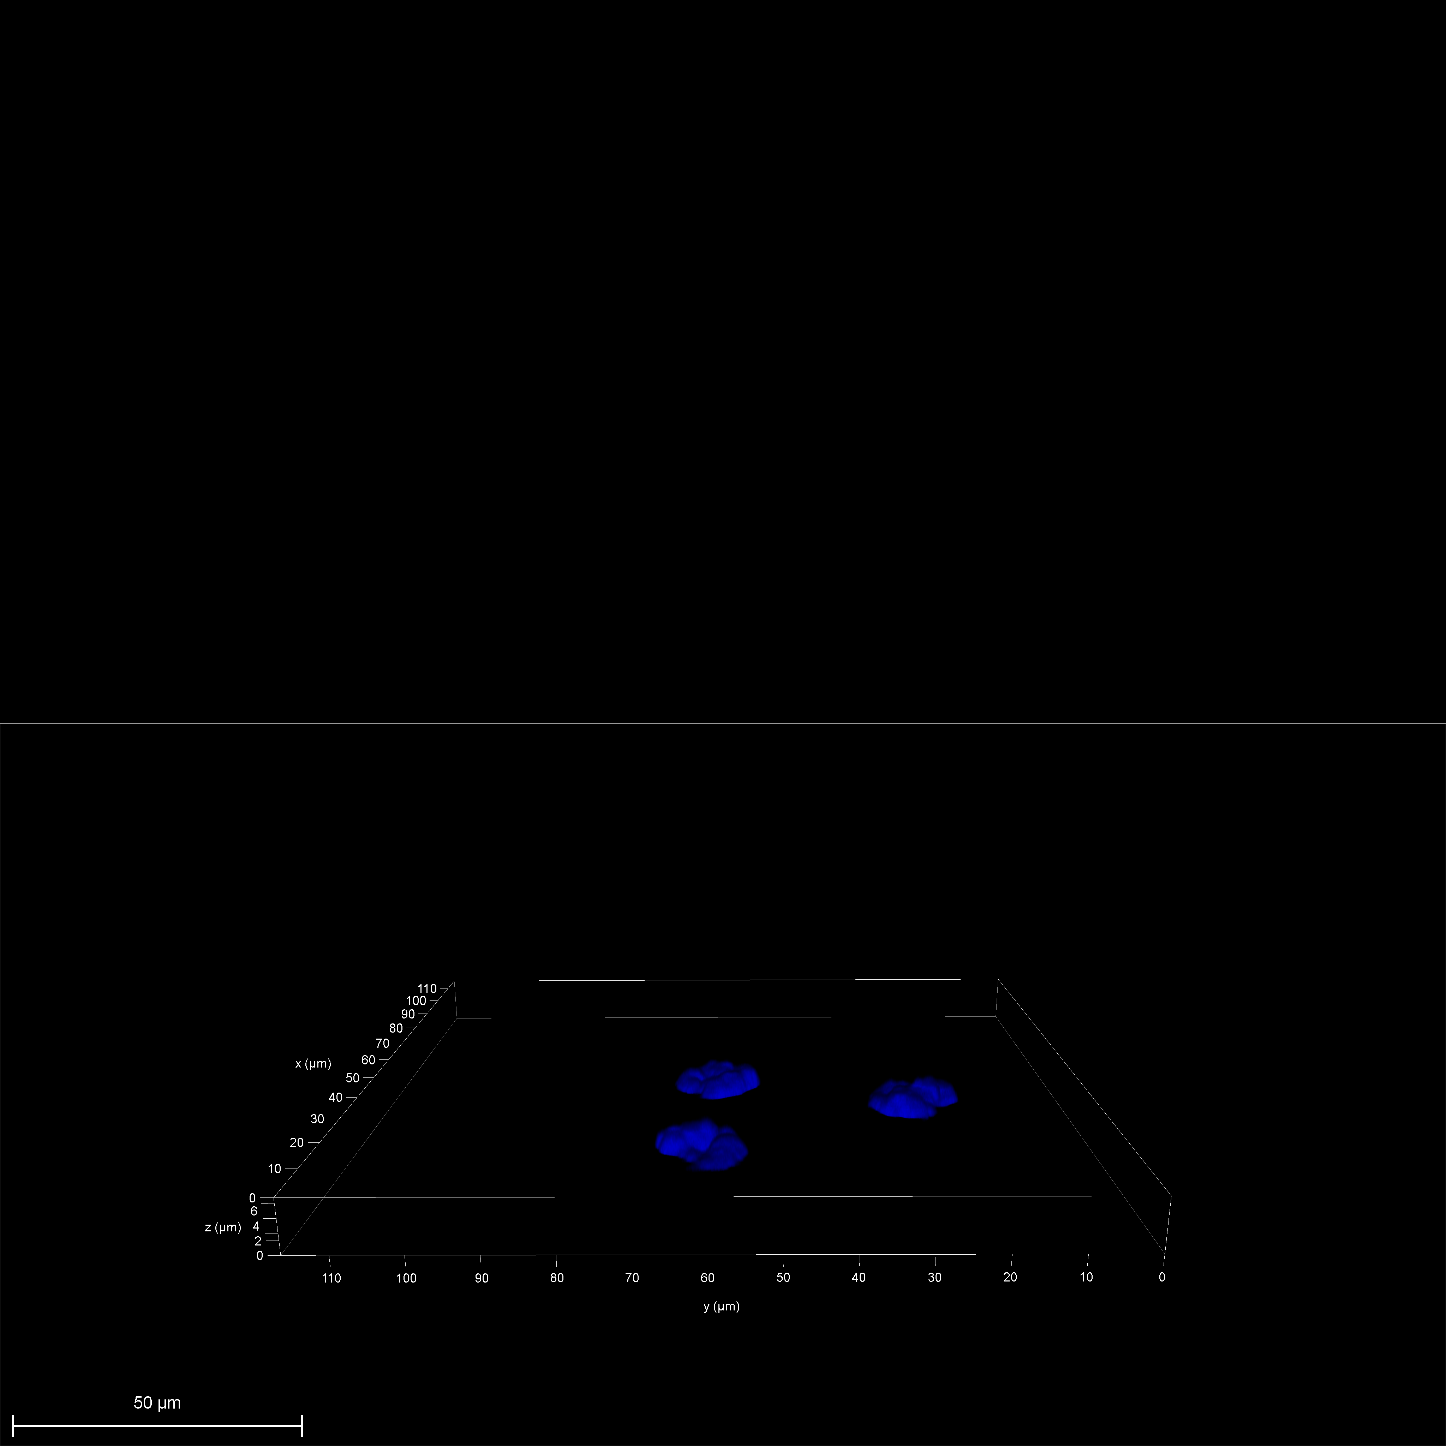

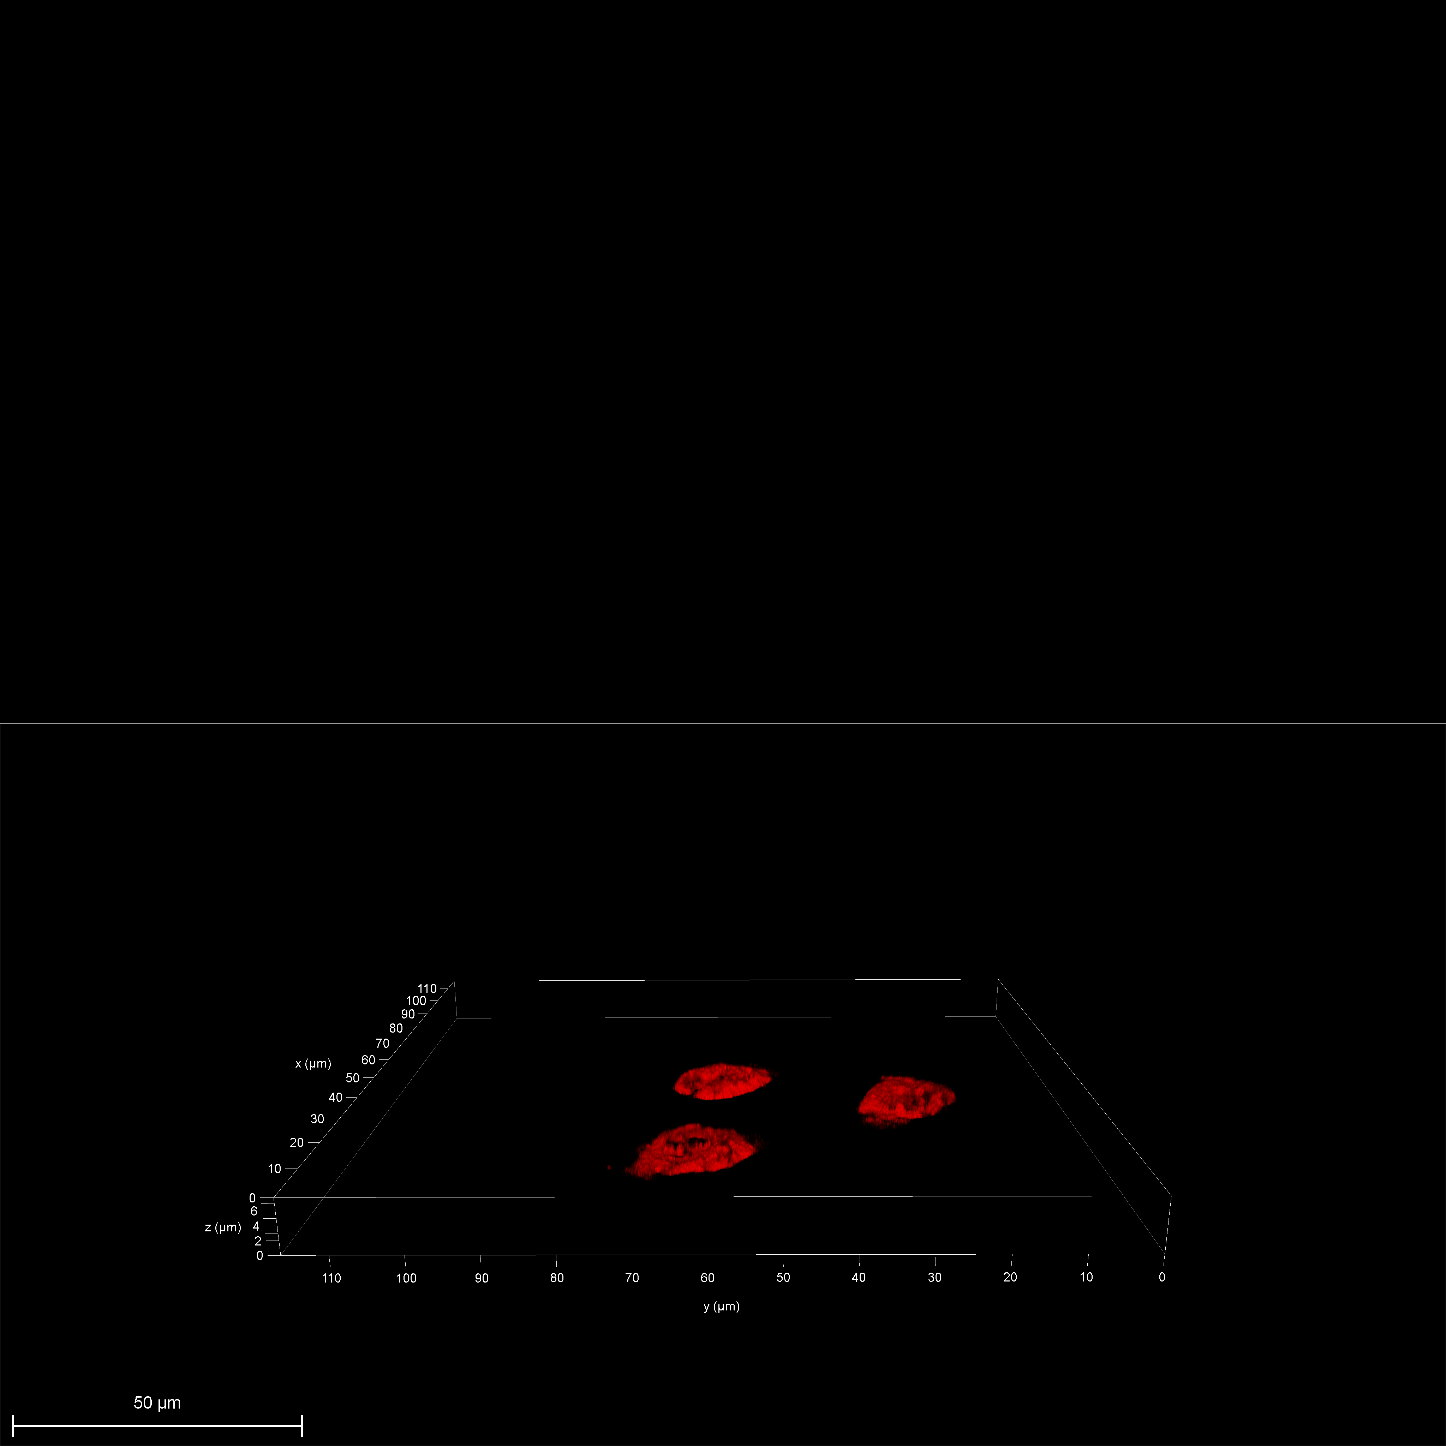

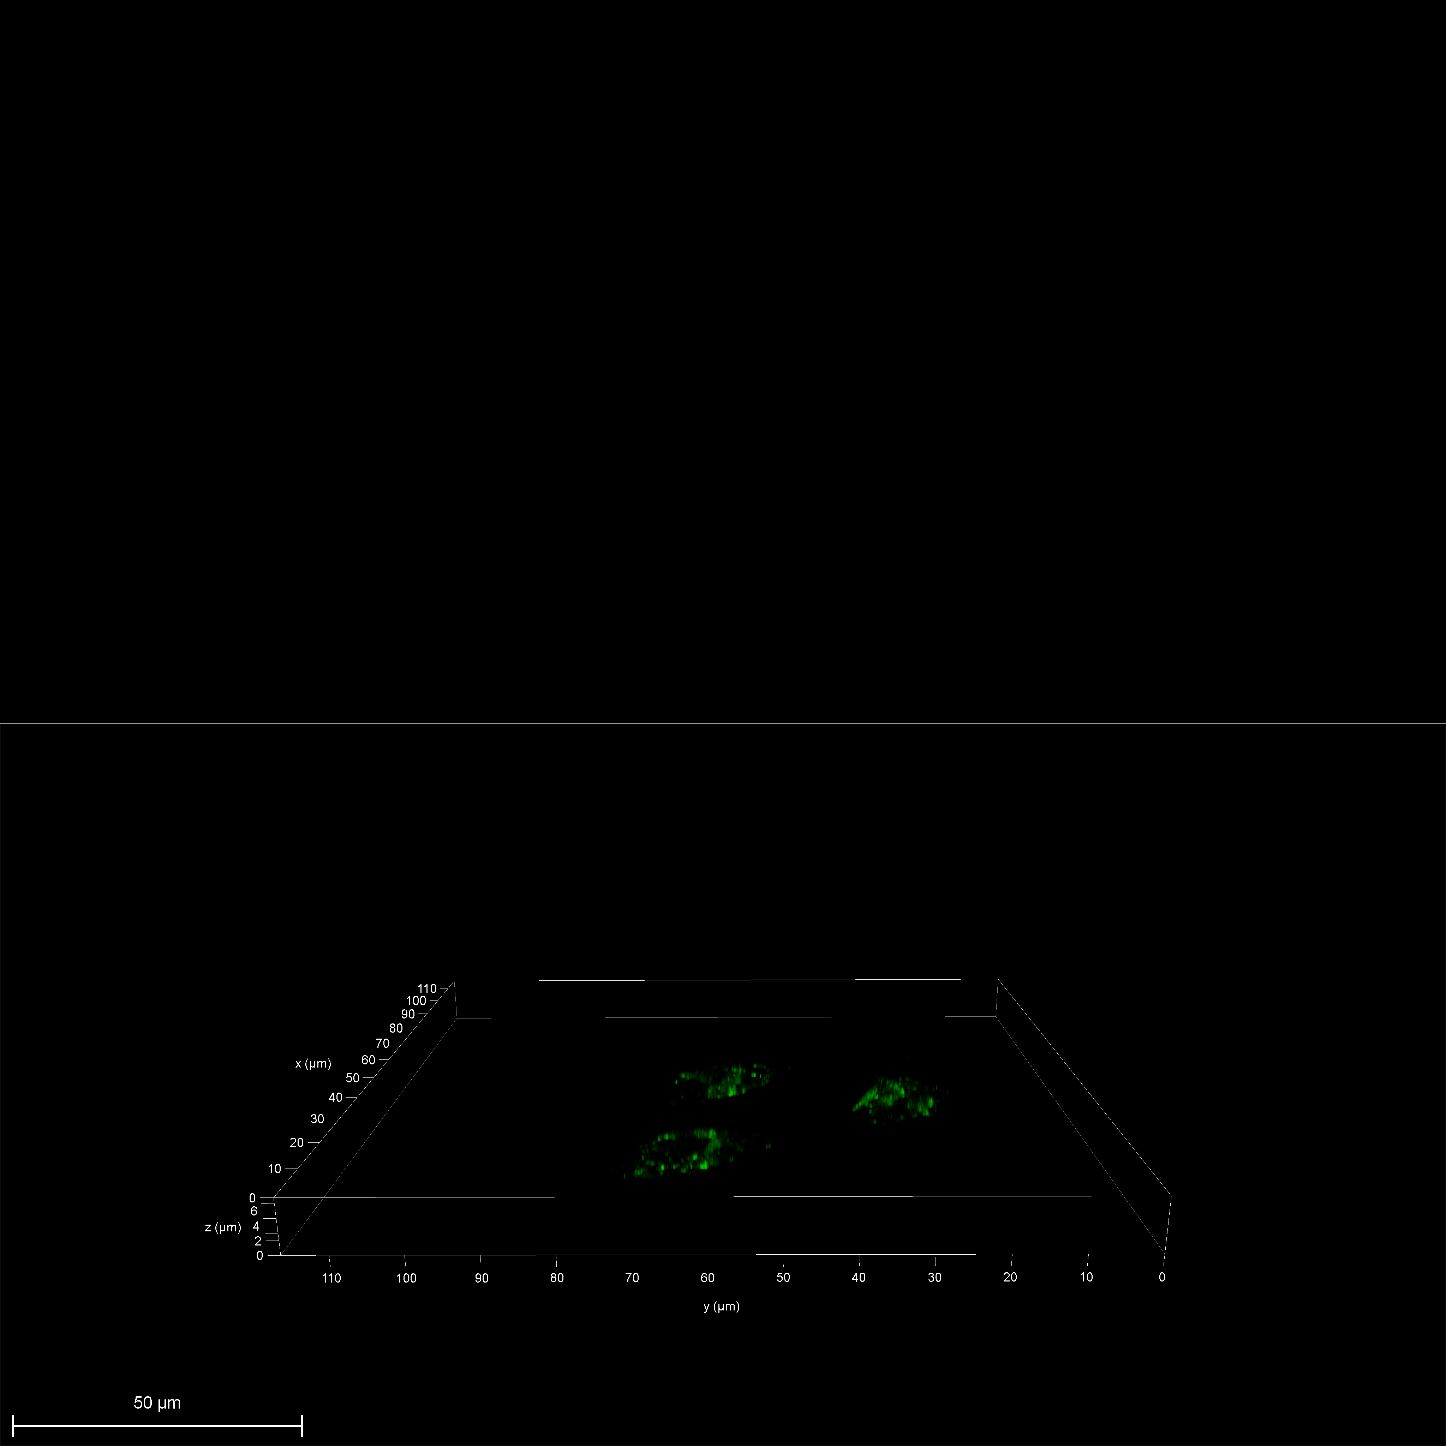

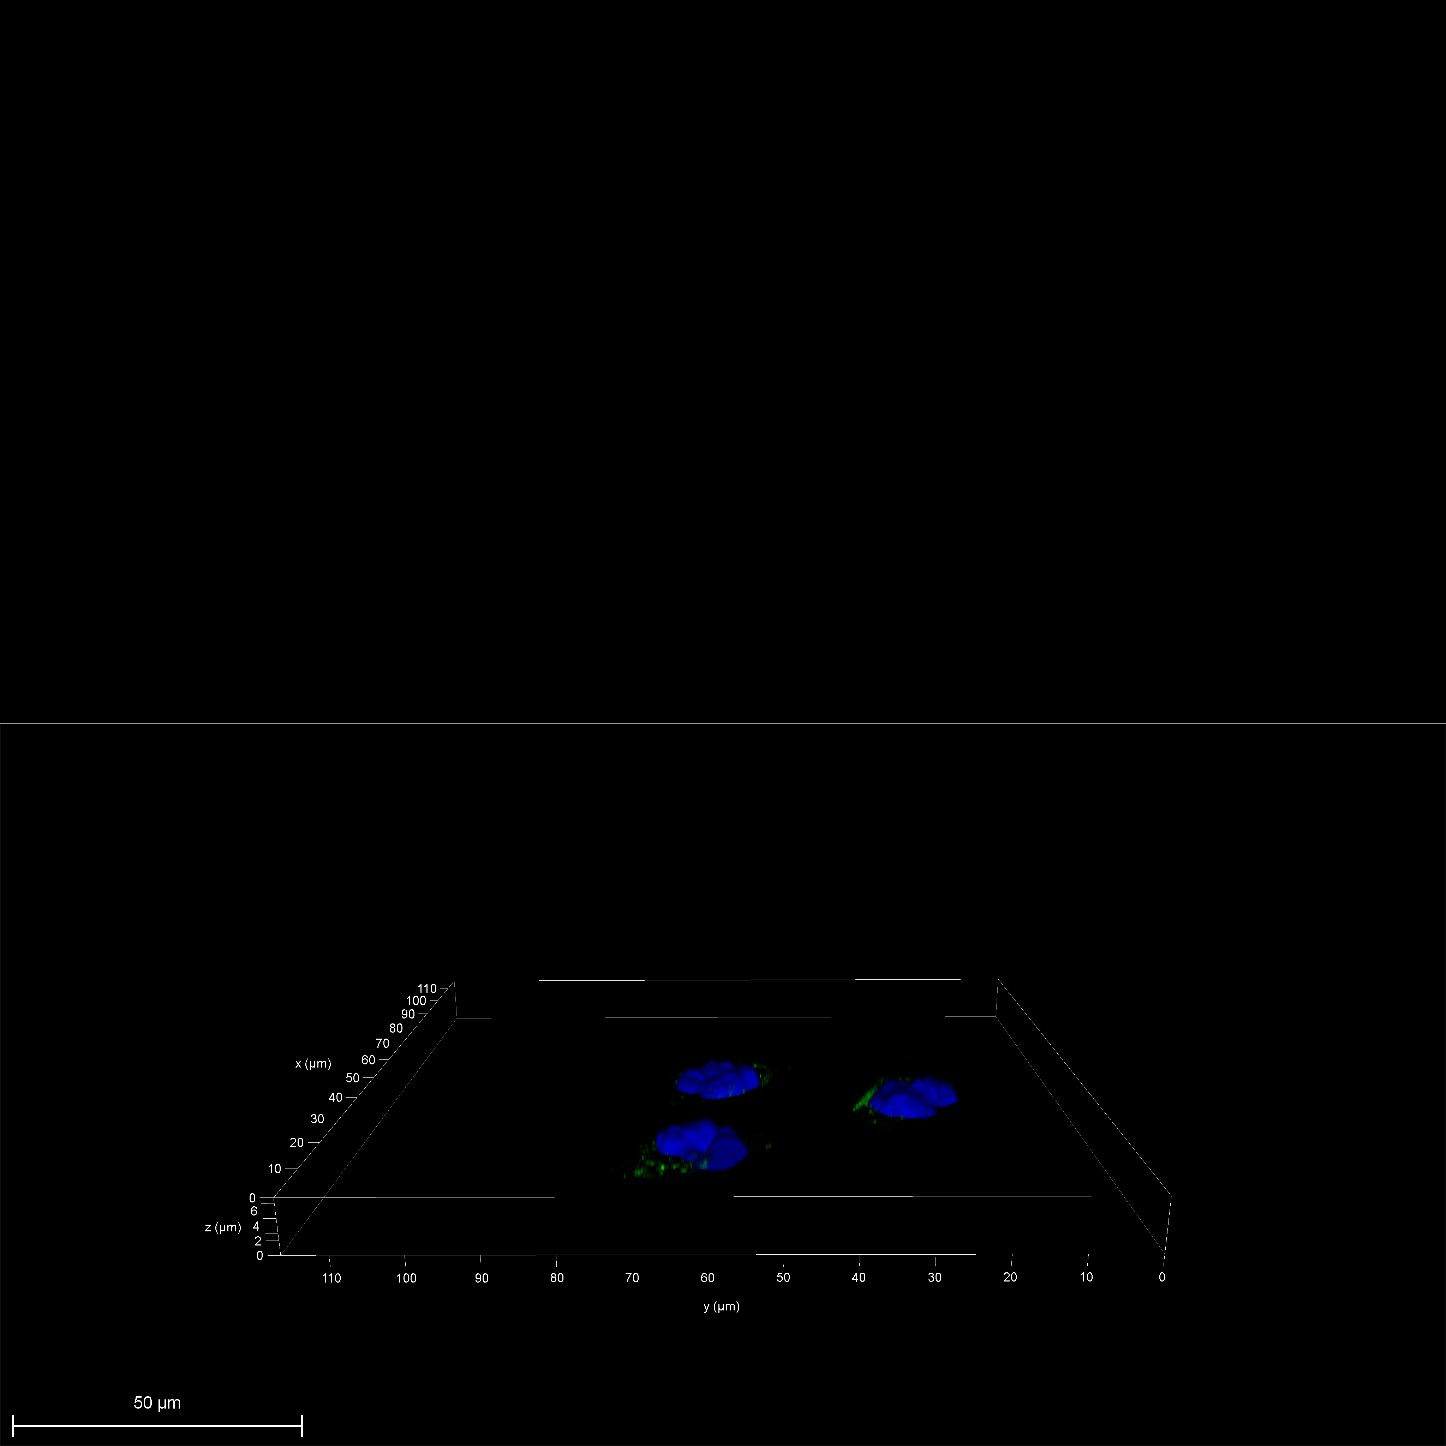

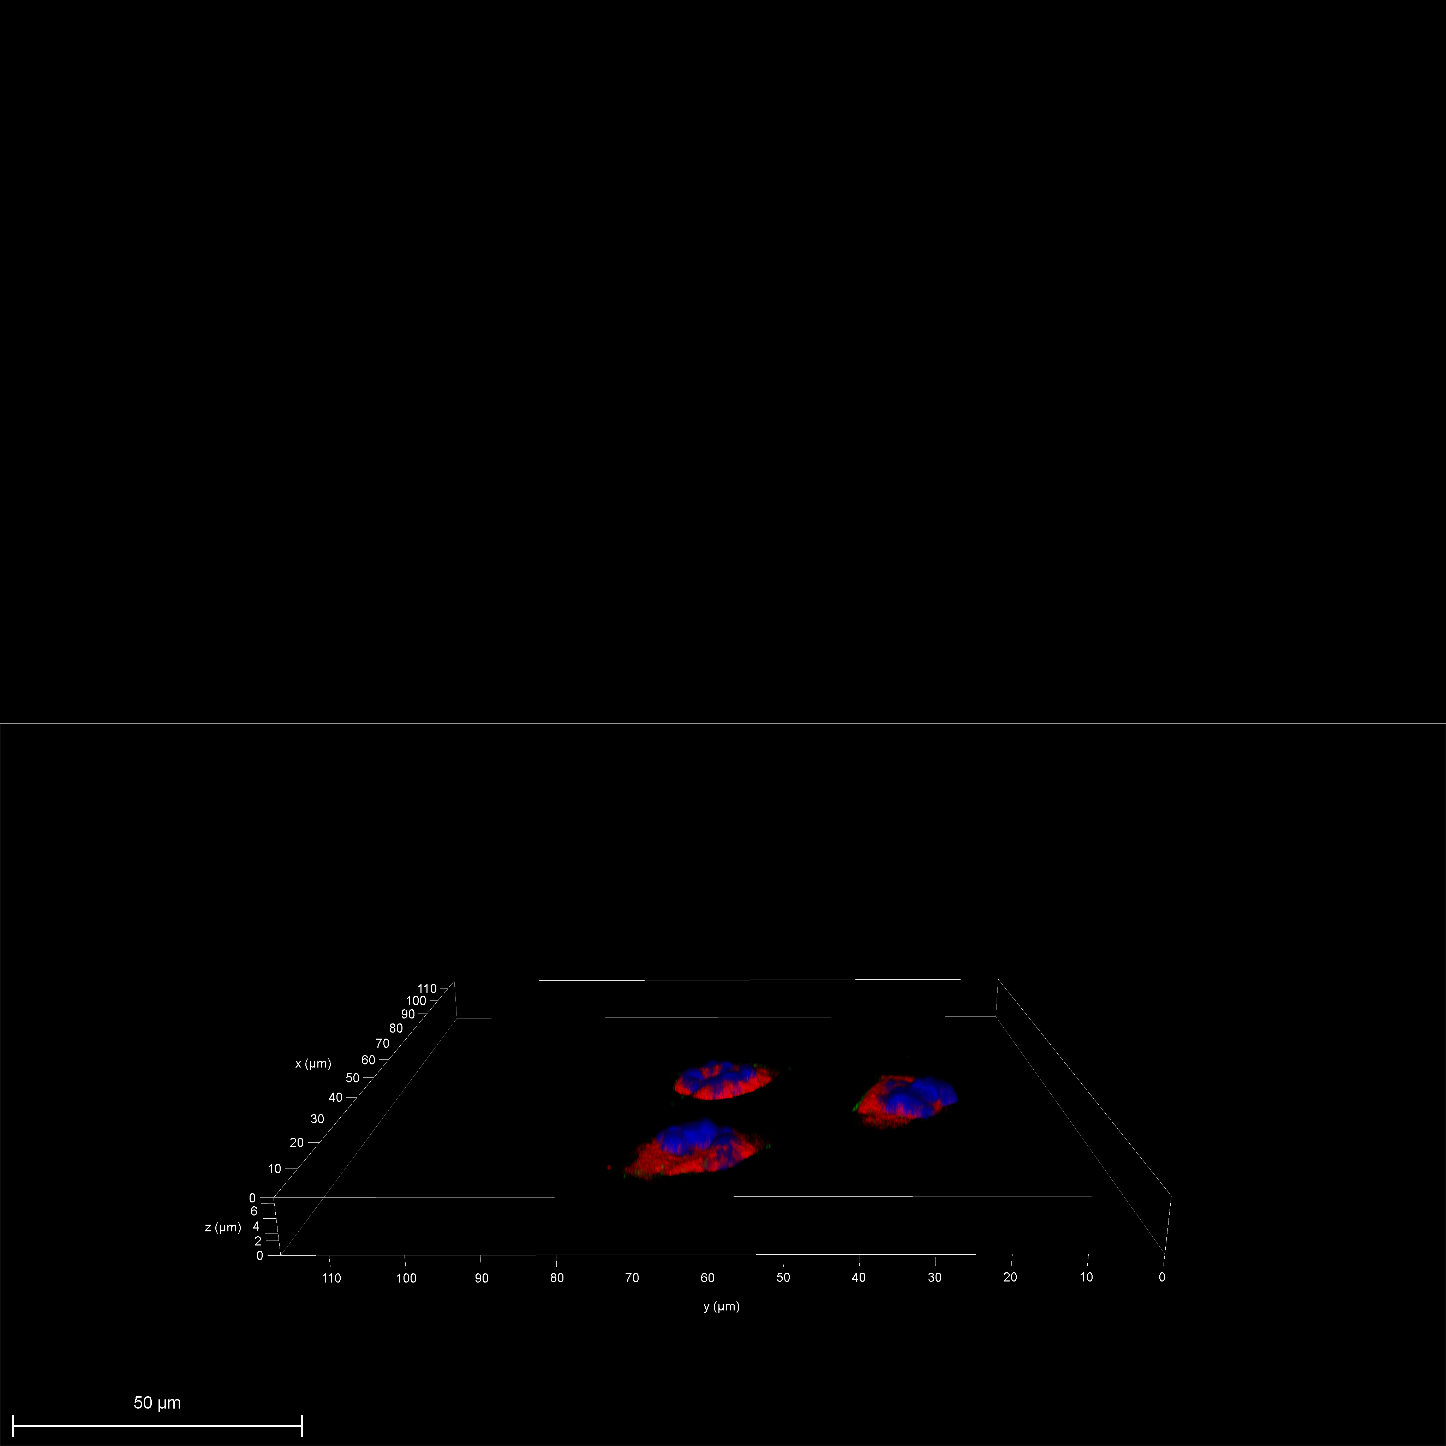


III

I

II

IV

V

B) SKBR after 3 hours of incubation with F-TZ

I


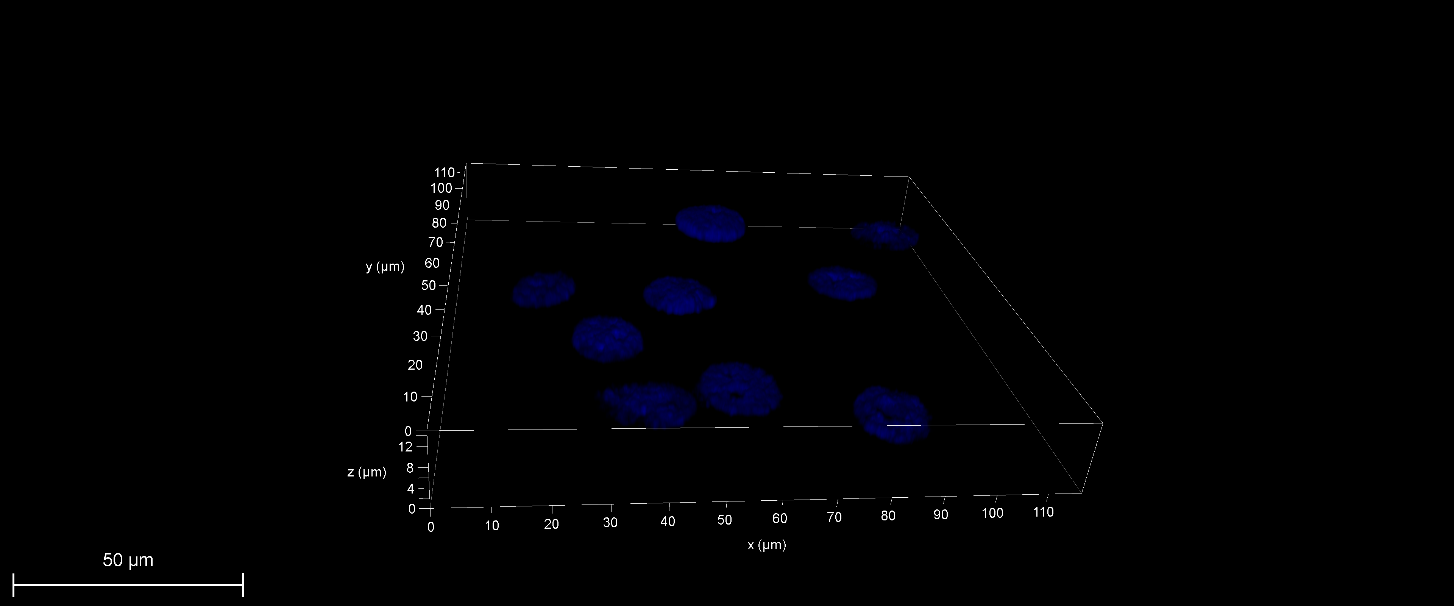

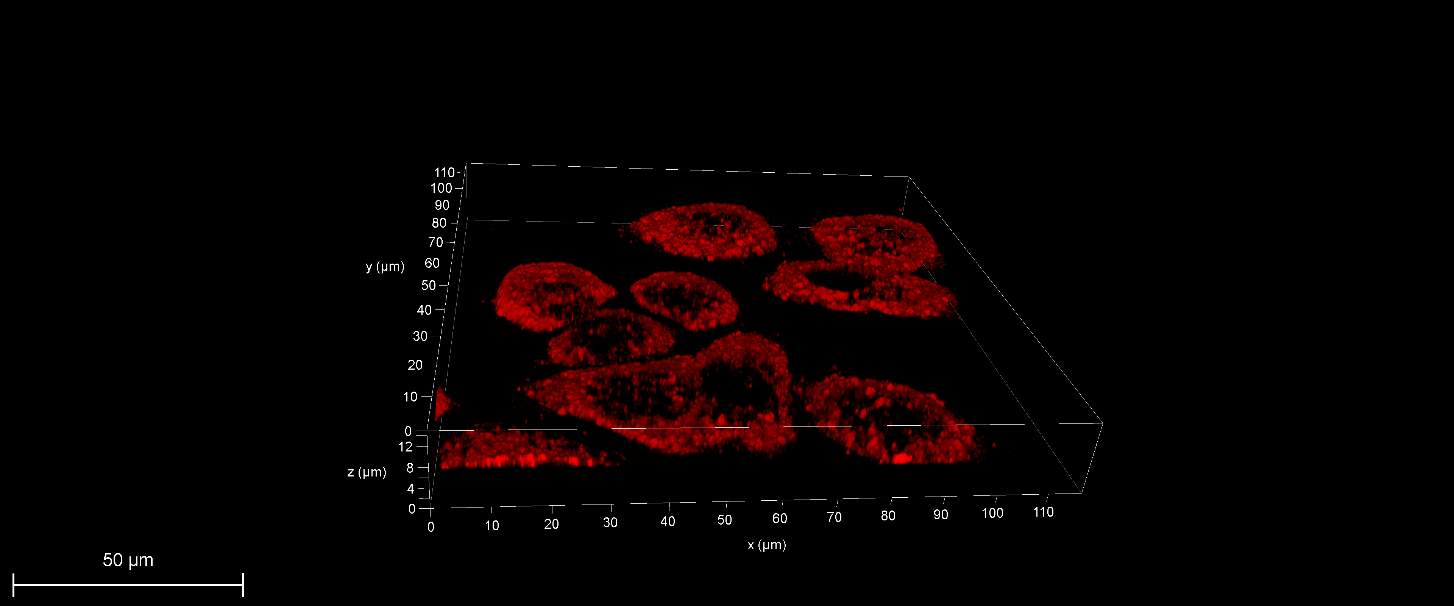

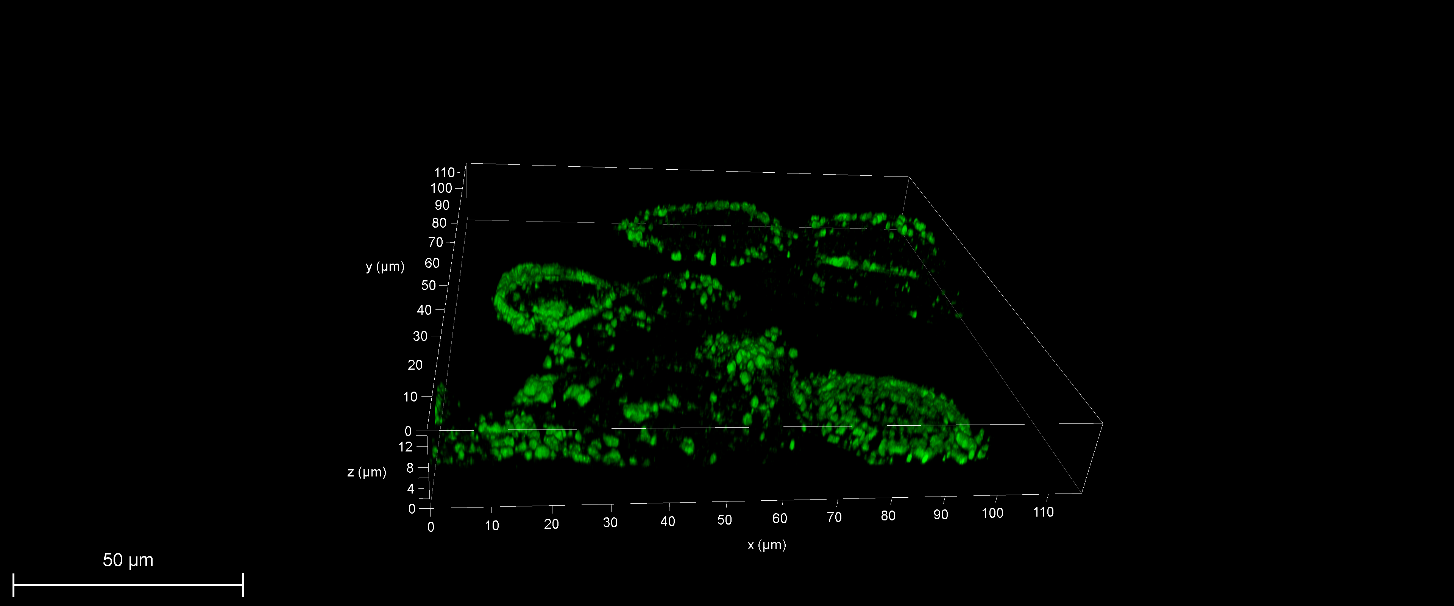

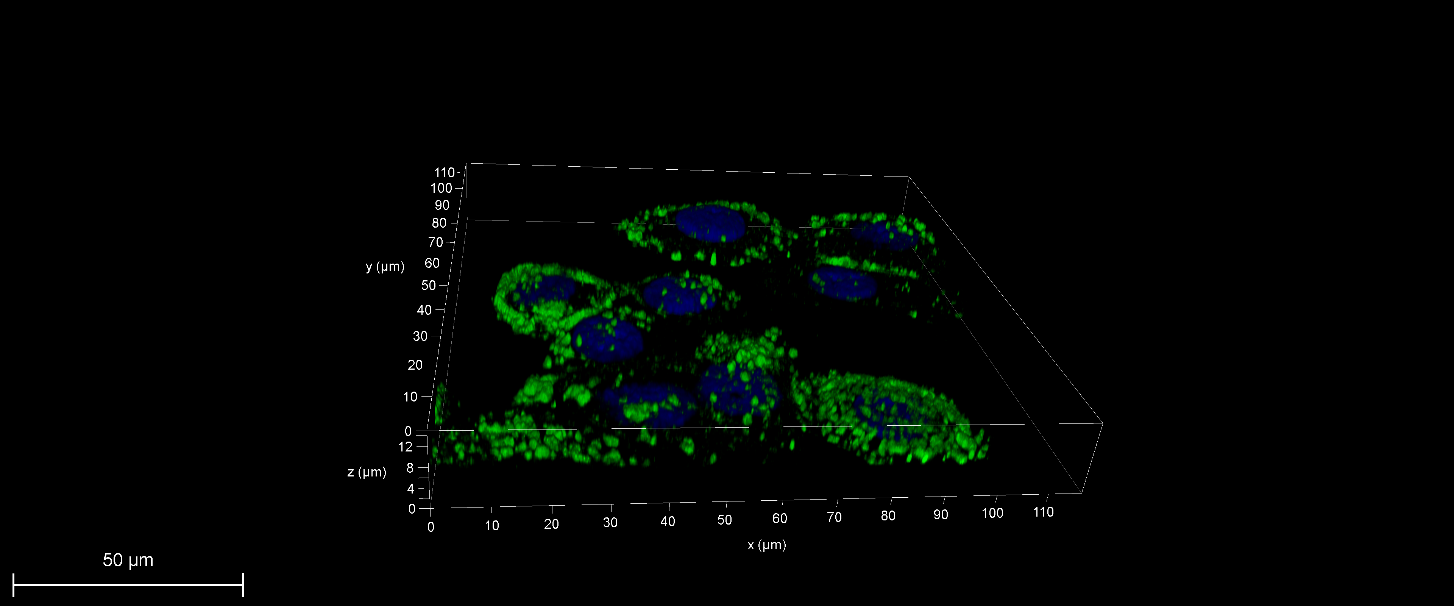

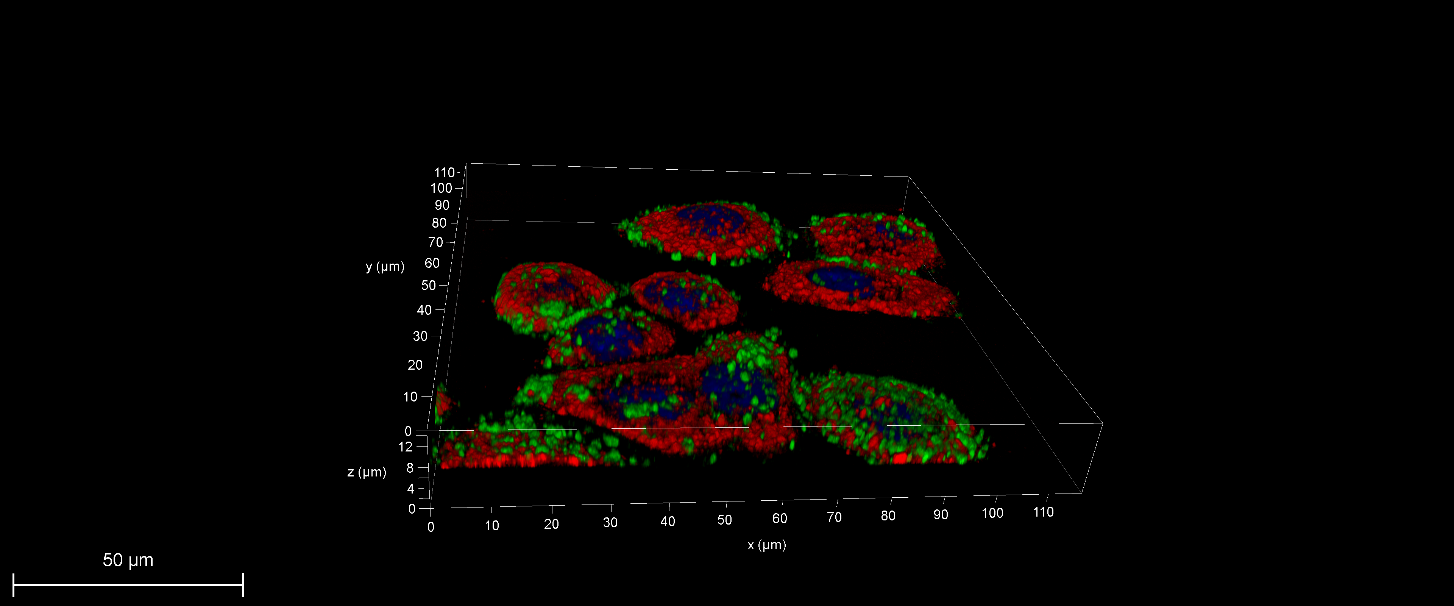


III

II

IV

V

C) SKBR after 30 minuts of incubation with F-TZP

I


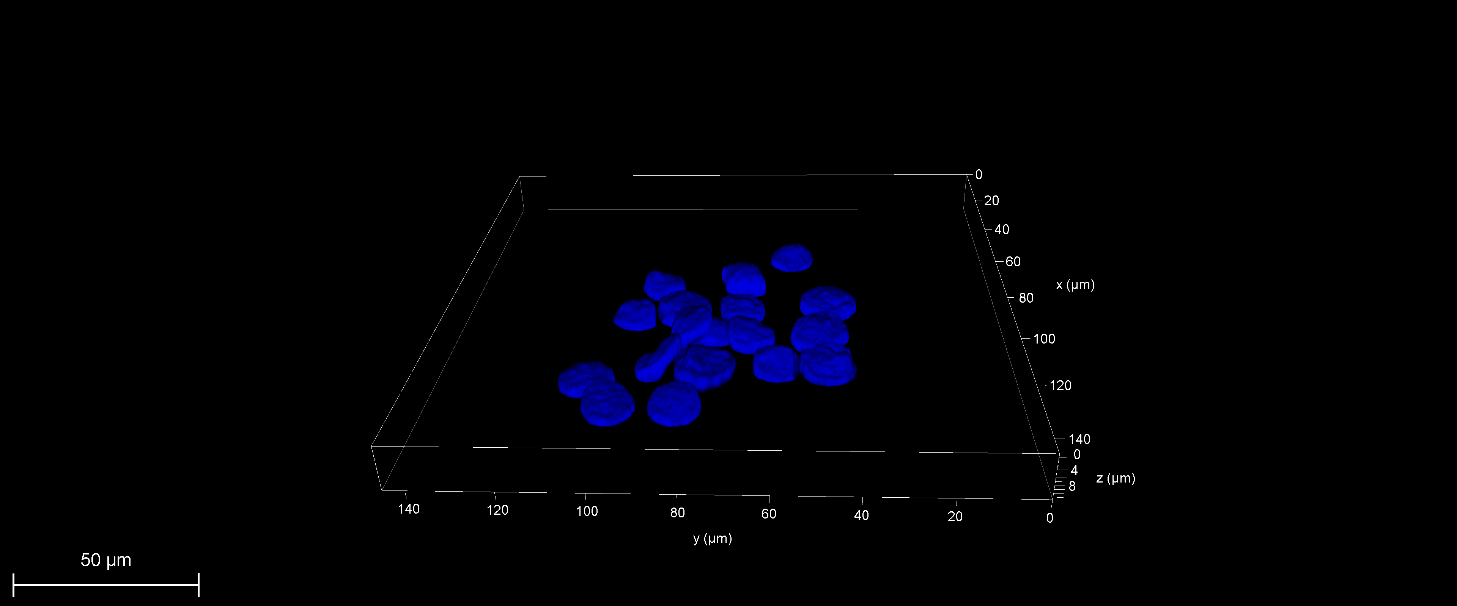

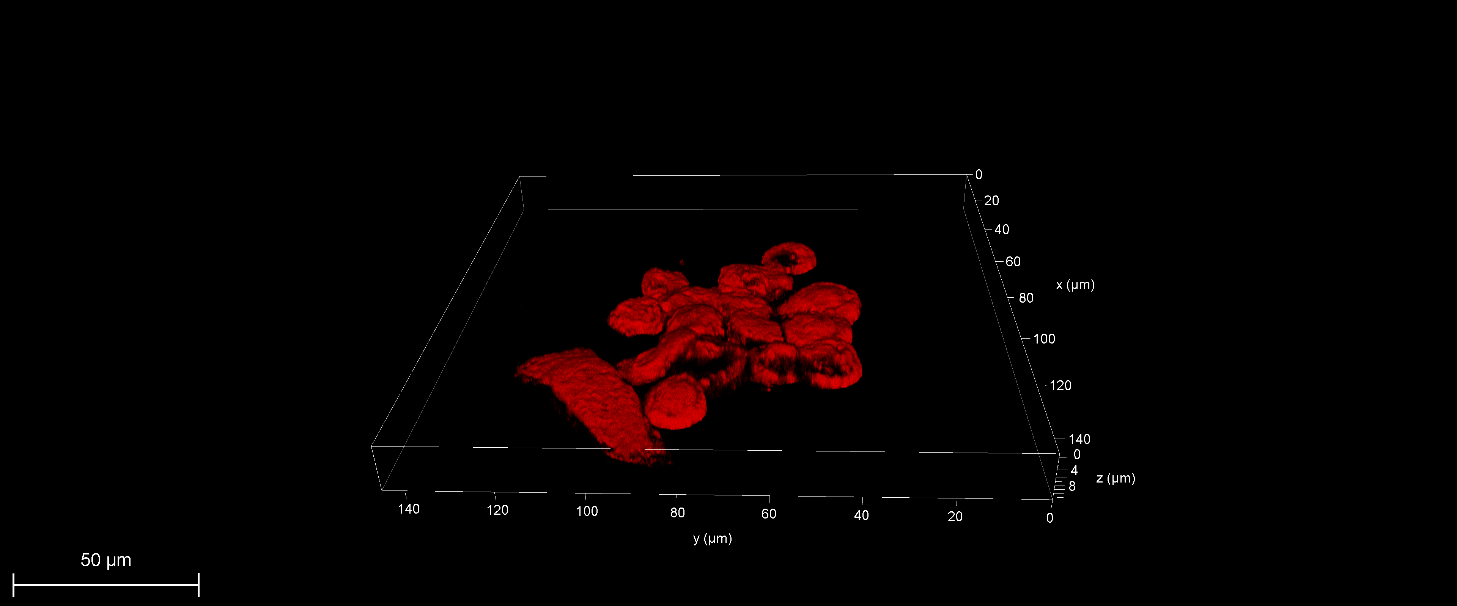

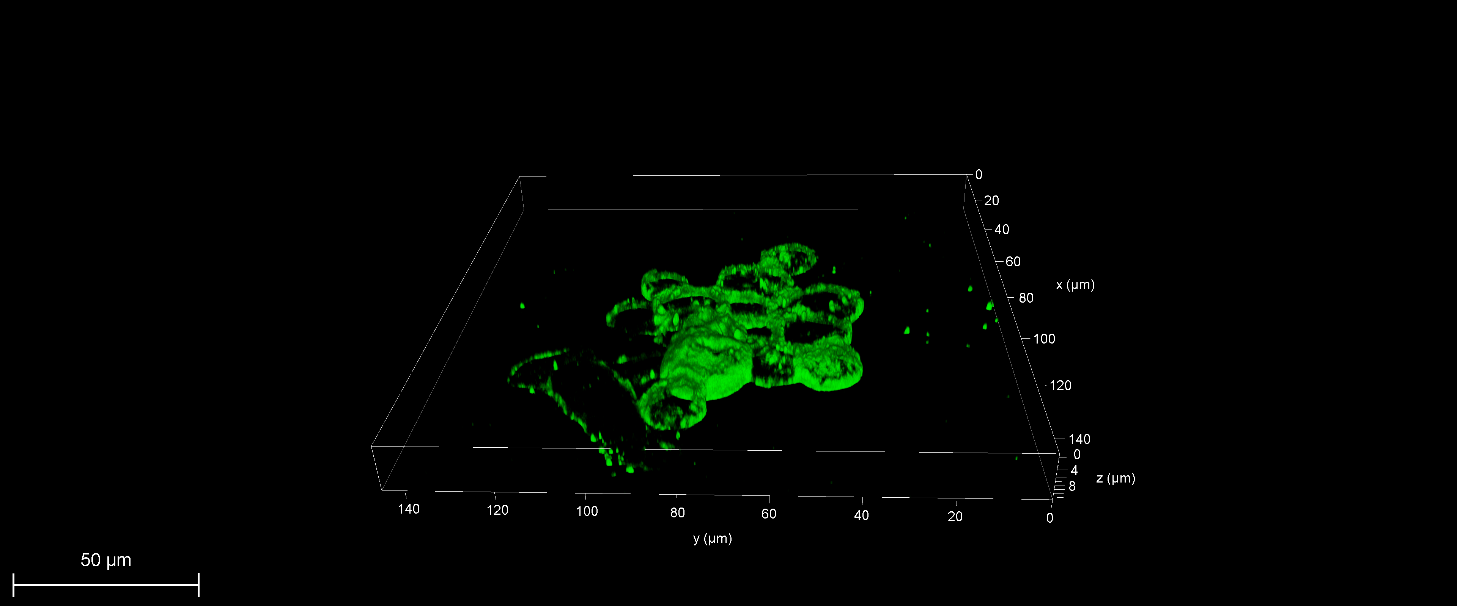

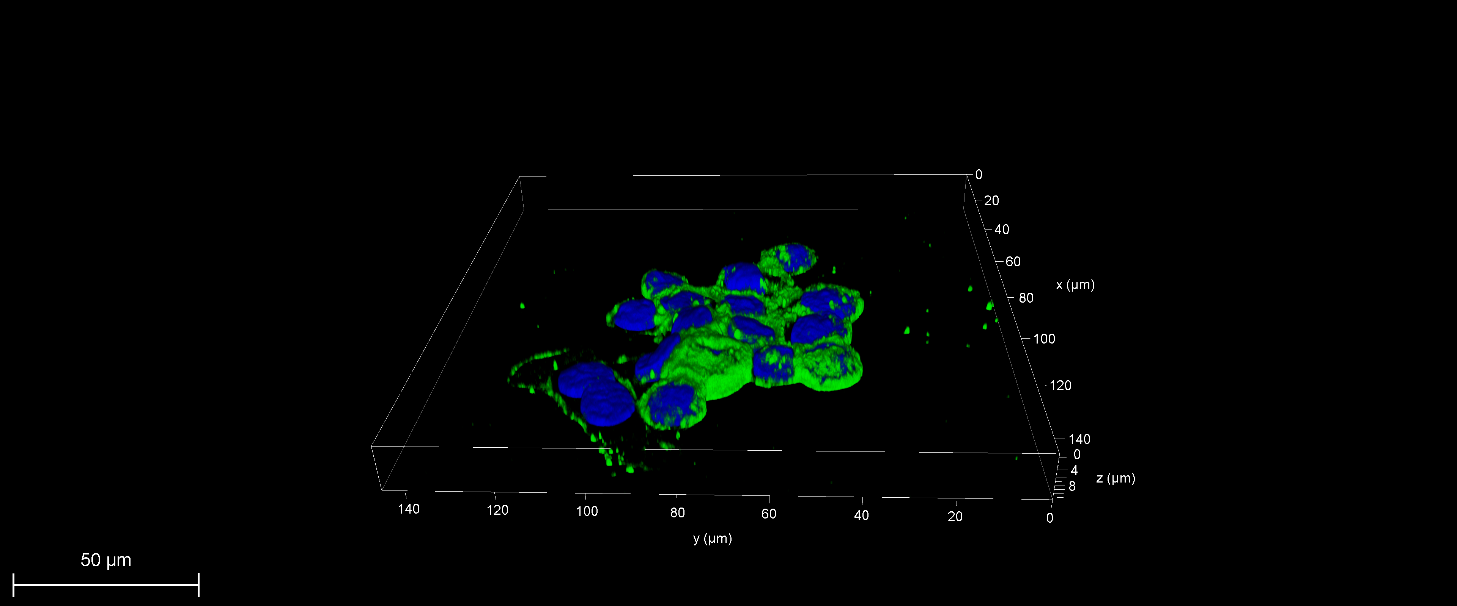

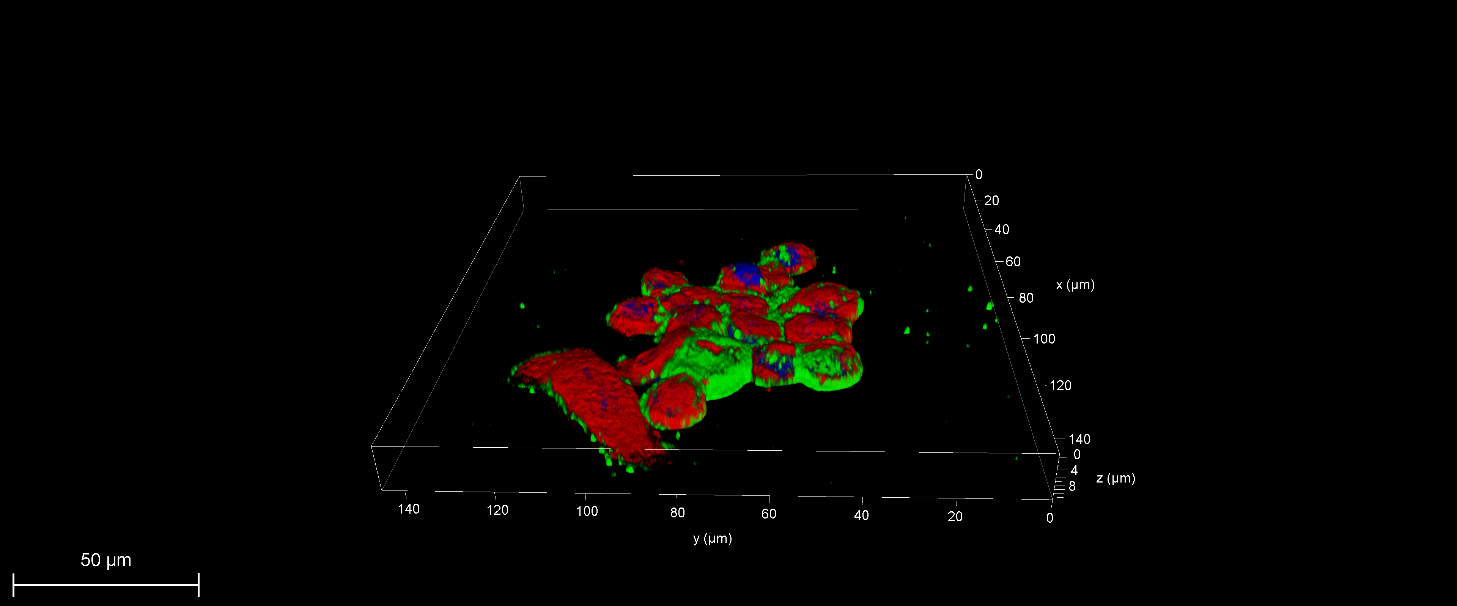


III

II

IV

V

D) SKBR after 3 hours of incubation with F-TZP


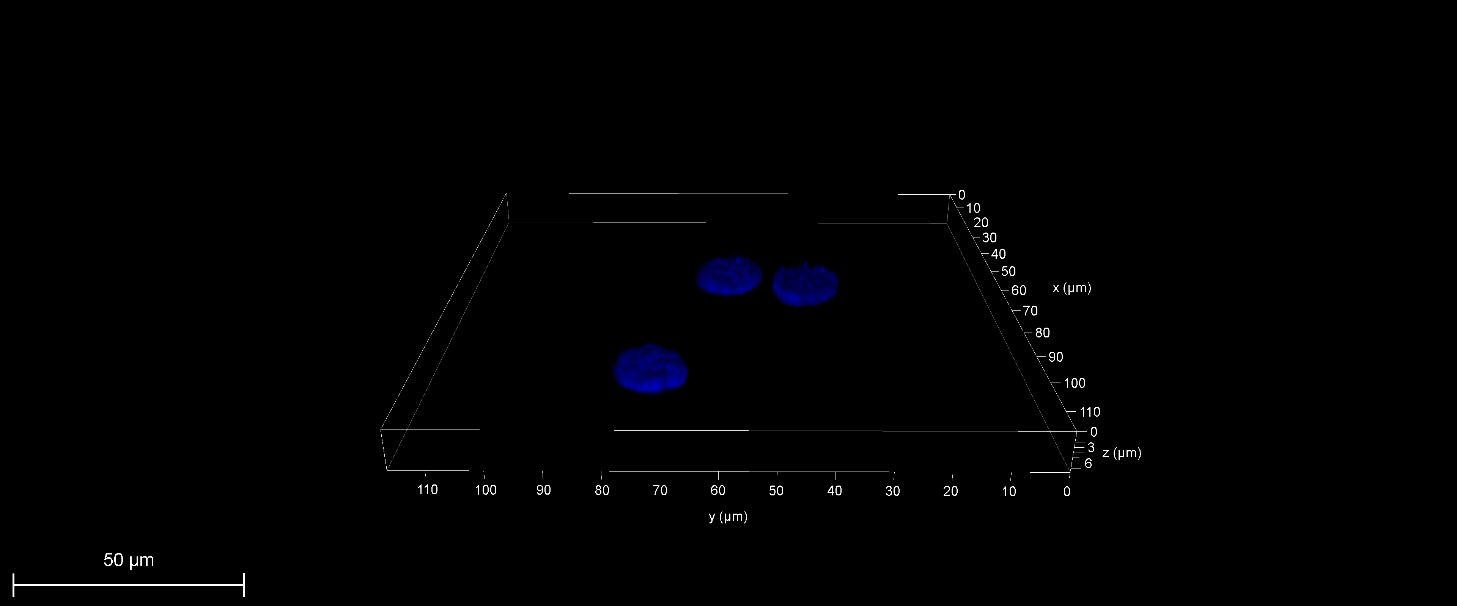

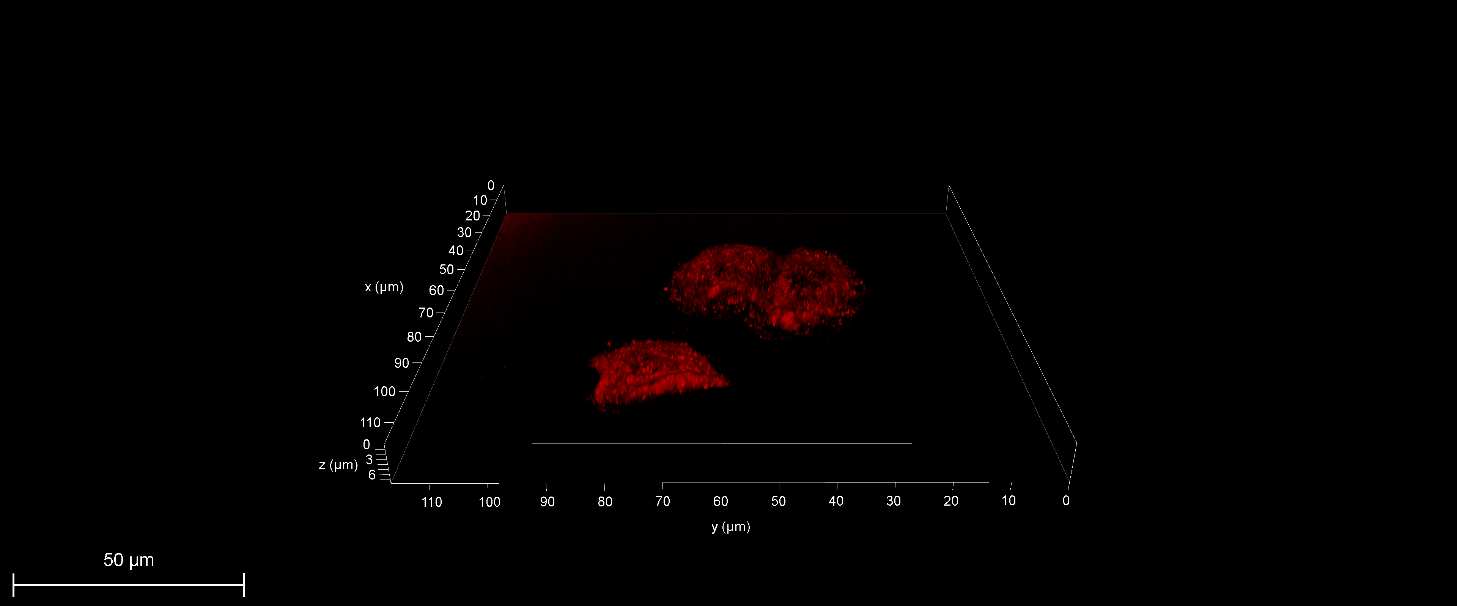

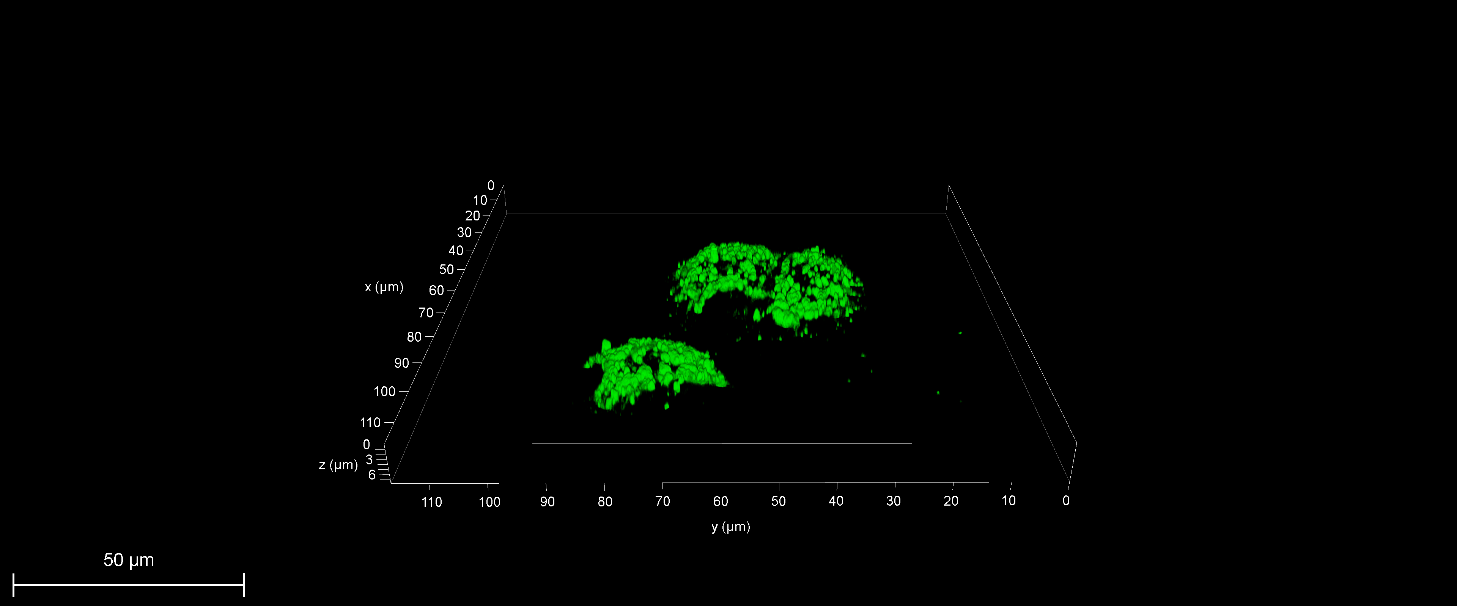

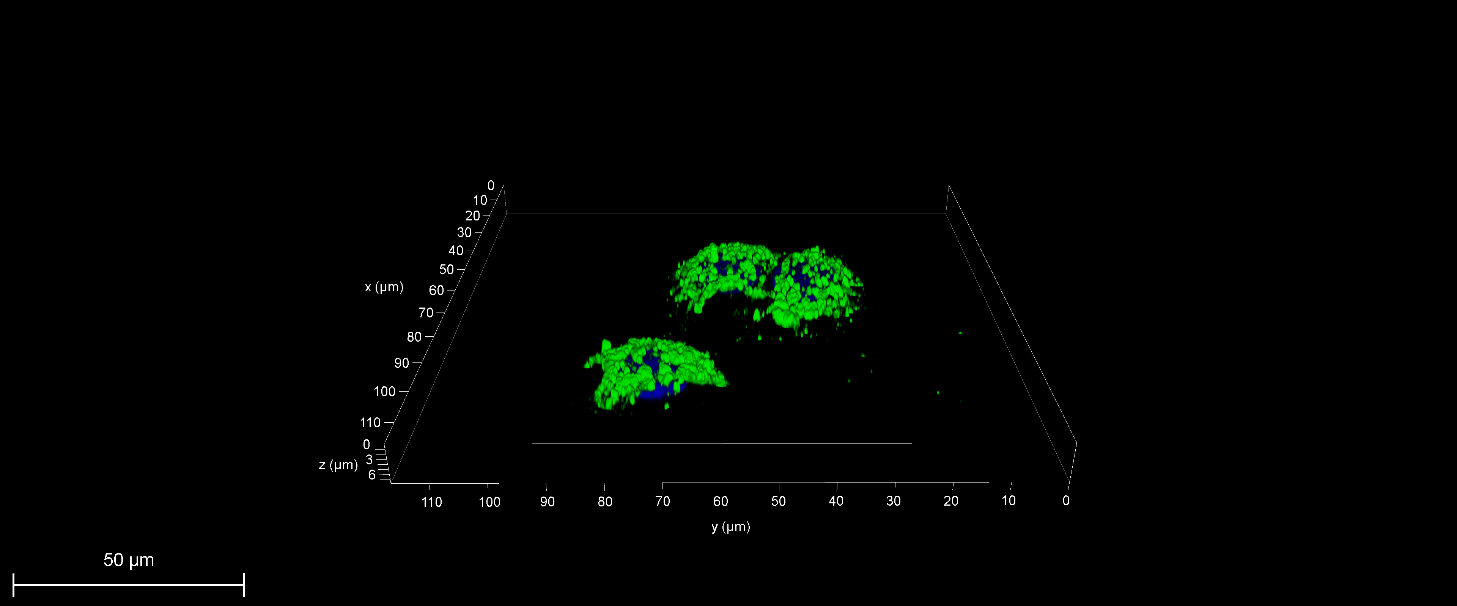

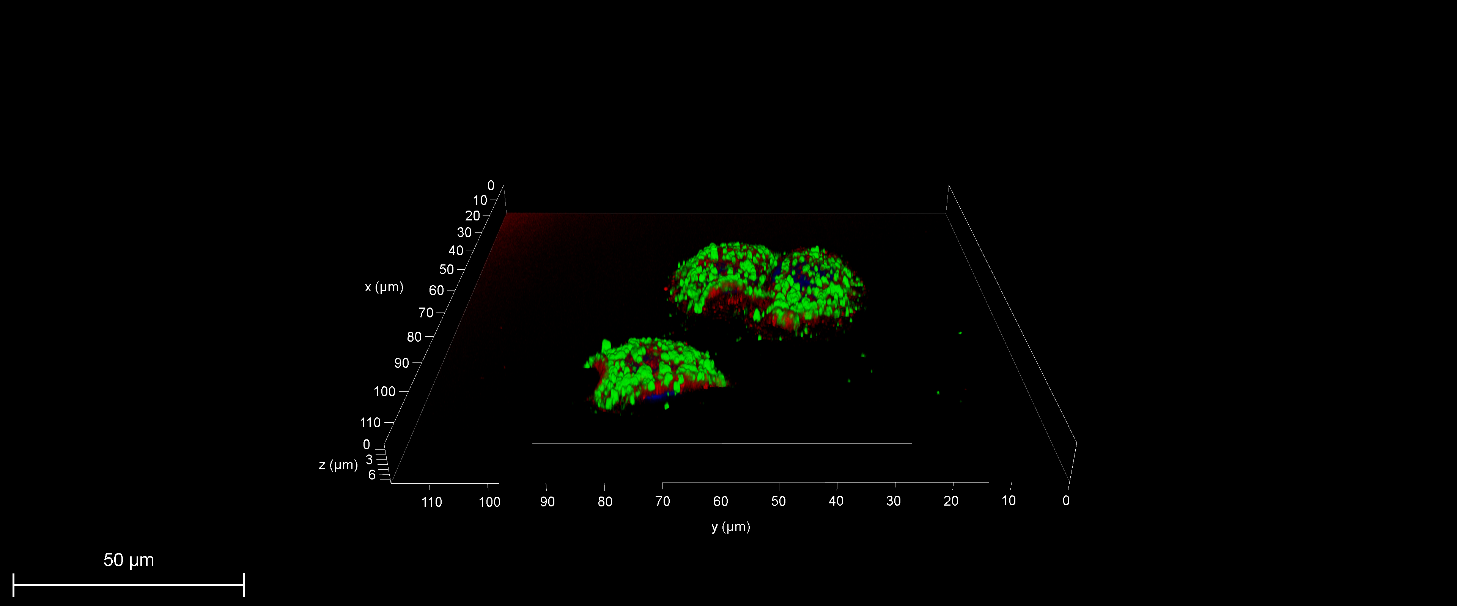


III

II

I

V

IV

**Figure S4**


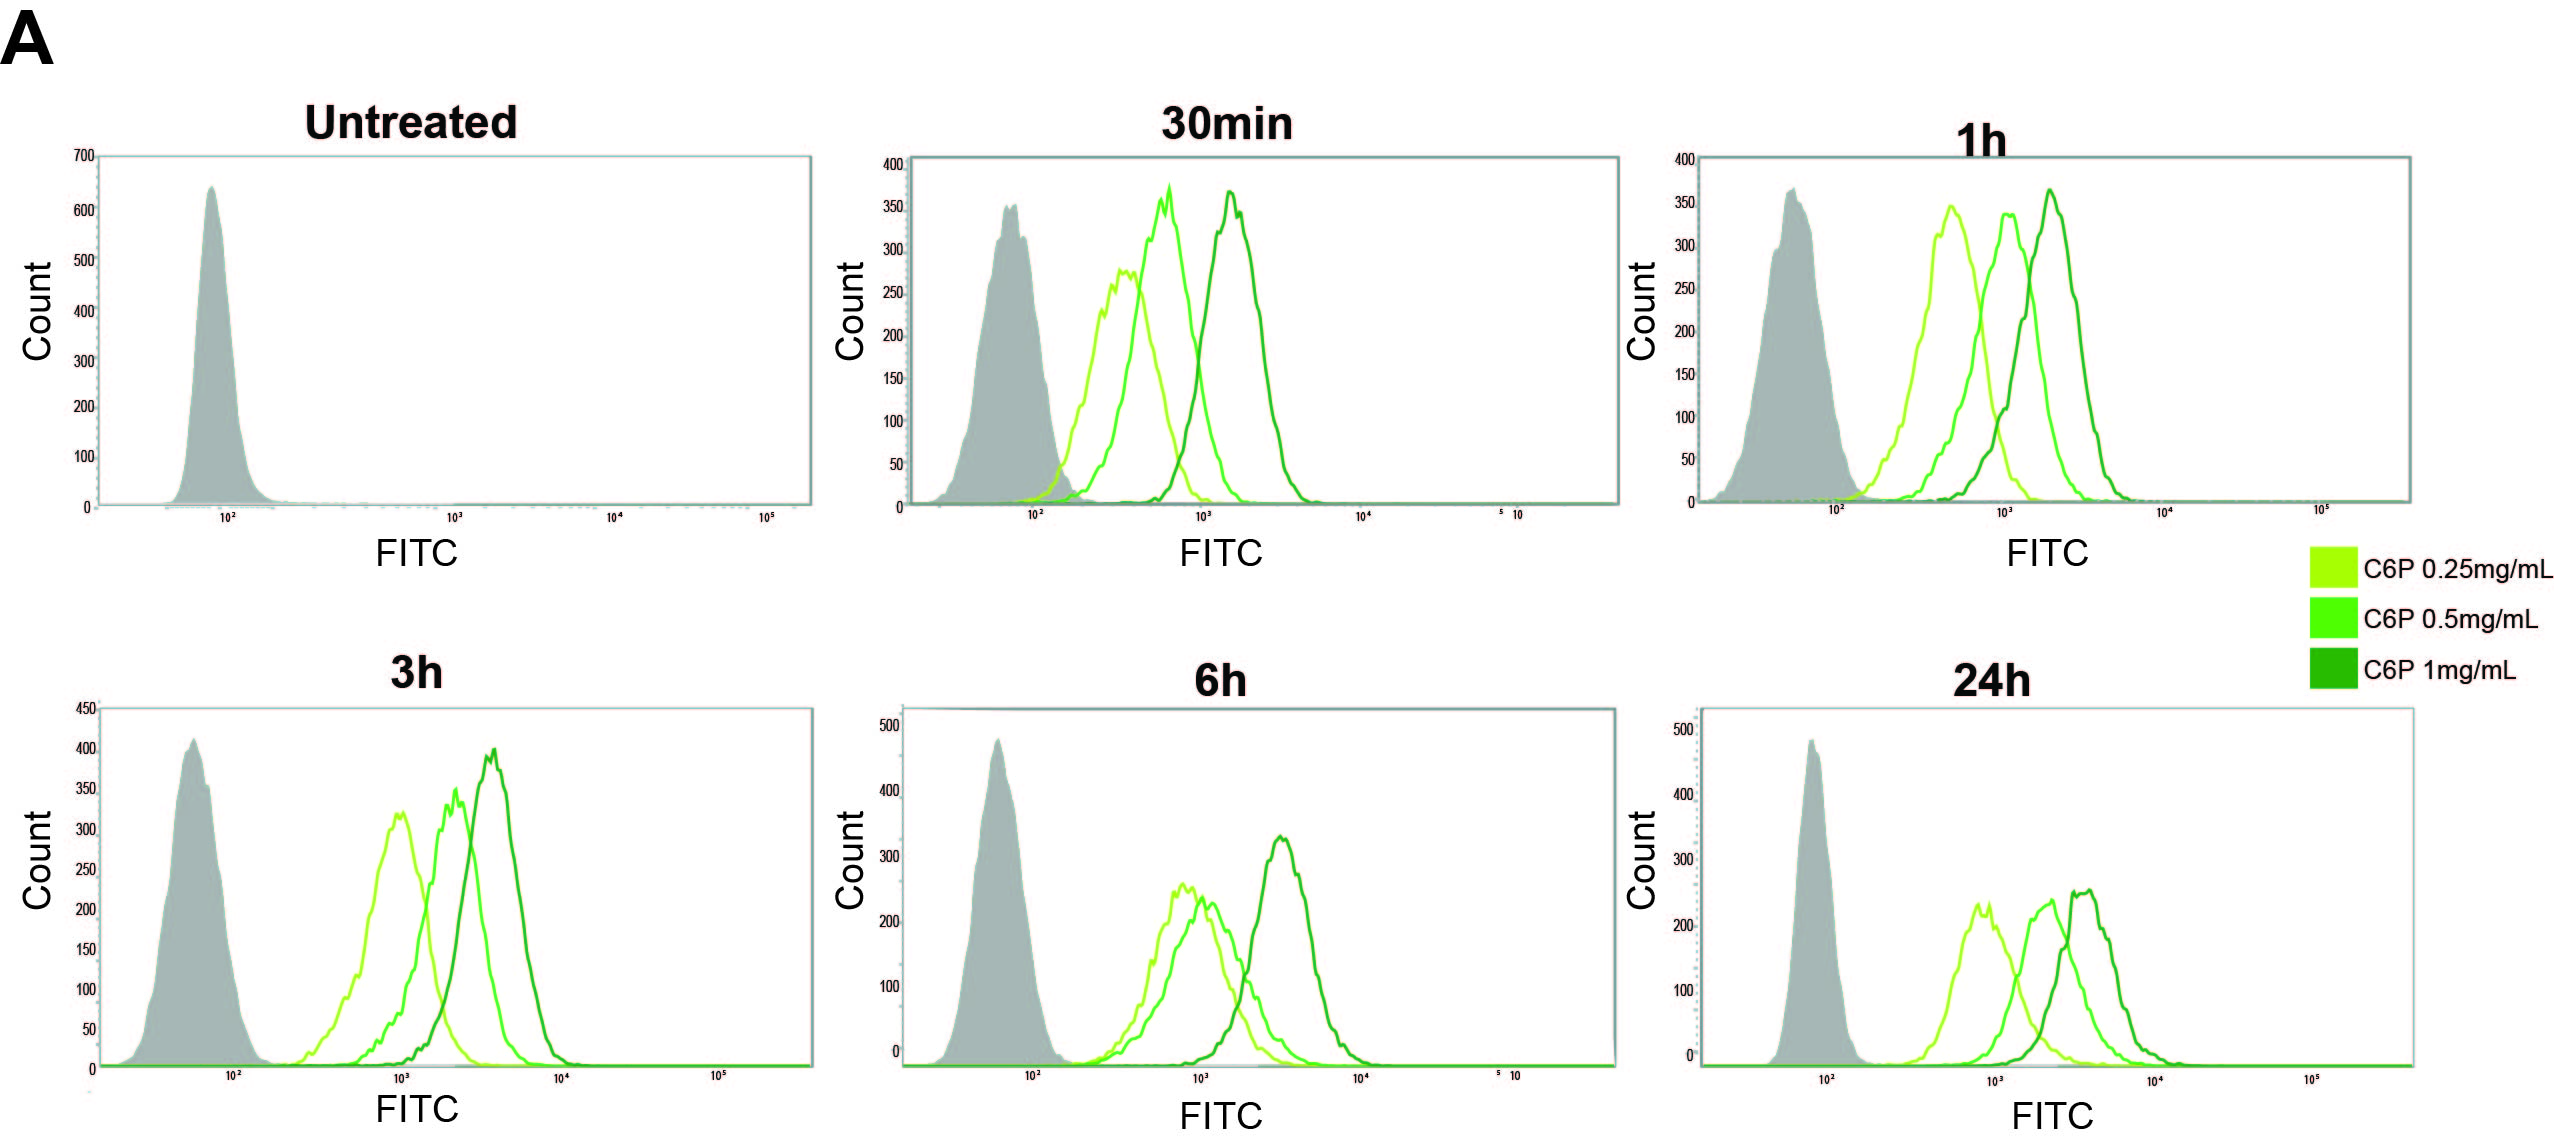


**Figure S4 A**) Flow cytometry analysis of coumarin 6-loaded particles (C6P) uptake by SKBR3 cells. The curves illustrated in the panels refer to the levels of cellular Fluorescence Intensity after treatment with increasing concentrations of C6P (0.25 - 0.5 - 1 mg) for 30 min, 1 - 3- 6 - 24 h.

**Figure S5
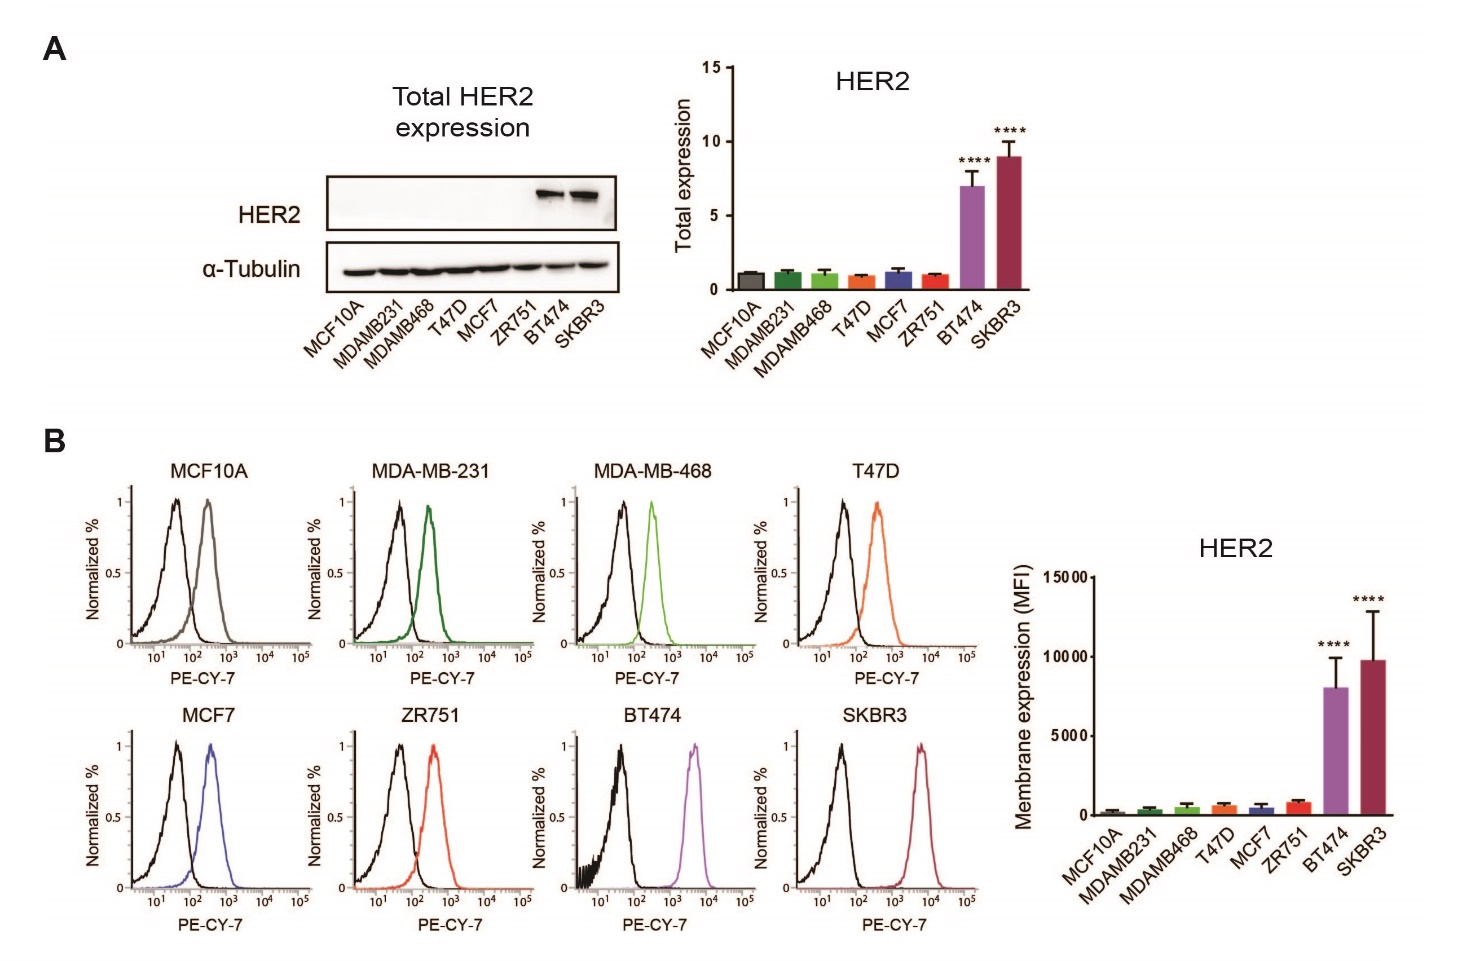
**

**Figure S5 HER2 expression and cell surface exposure in breast cancer derived cell lines. A**) Western blot analysis of HER2 expression in the indicated cell lines representative of the different breast cancer subtypes and normal epithelium (MCF10A) with an anti-HER2 specific antibody. The histogram on the right illustrates the relative quantification after normalization to α-Tubulin used as control of equivalent protein loading in each lane. **B**) Flow cytometry analysis of HER2 membrane exposure in the same cell lines using a PE-CY7 labelled anti-HER2 antibody. The histogram reports the relative quantification as mean fluorescence intensity (MFI).
